# Supplementary material for: IL-10 producing regulatory B cells are decreased in blood from smokers and COPD patients
Source: PubMed Central journal article supplement (PMC9578234; doi:10.1186/s12931-022-02208-1), 2022-10-17
Supplement: 12931_2022_2208_MOESM4_ESM.pdf [file 12931_2022_2208_MOESM4_ESM.pdf]

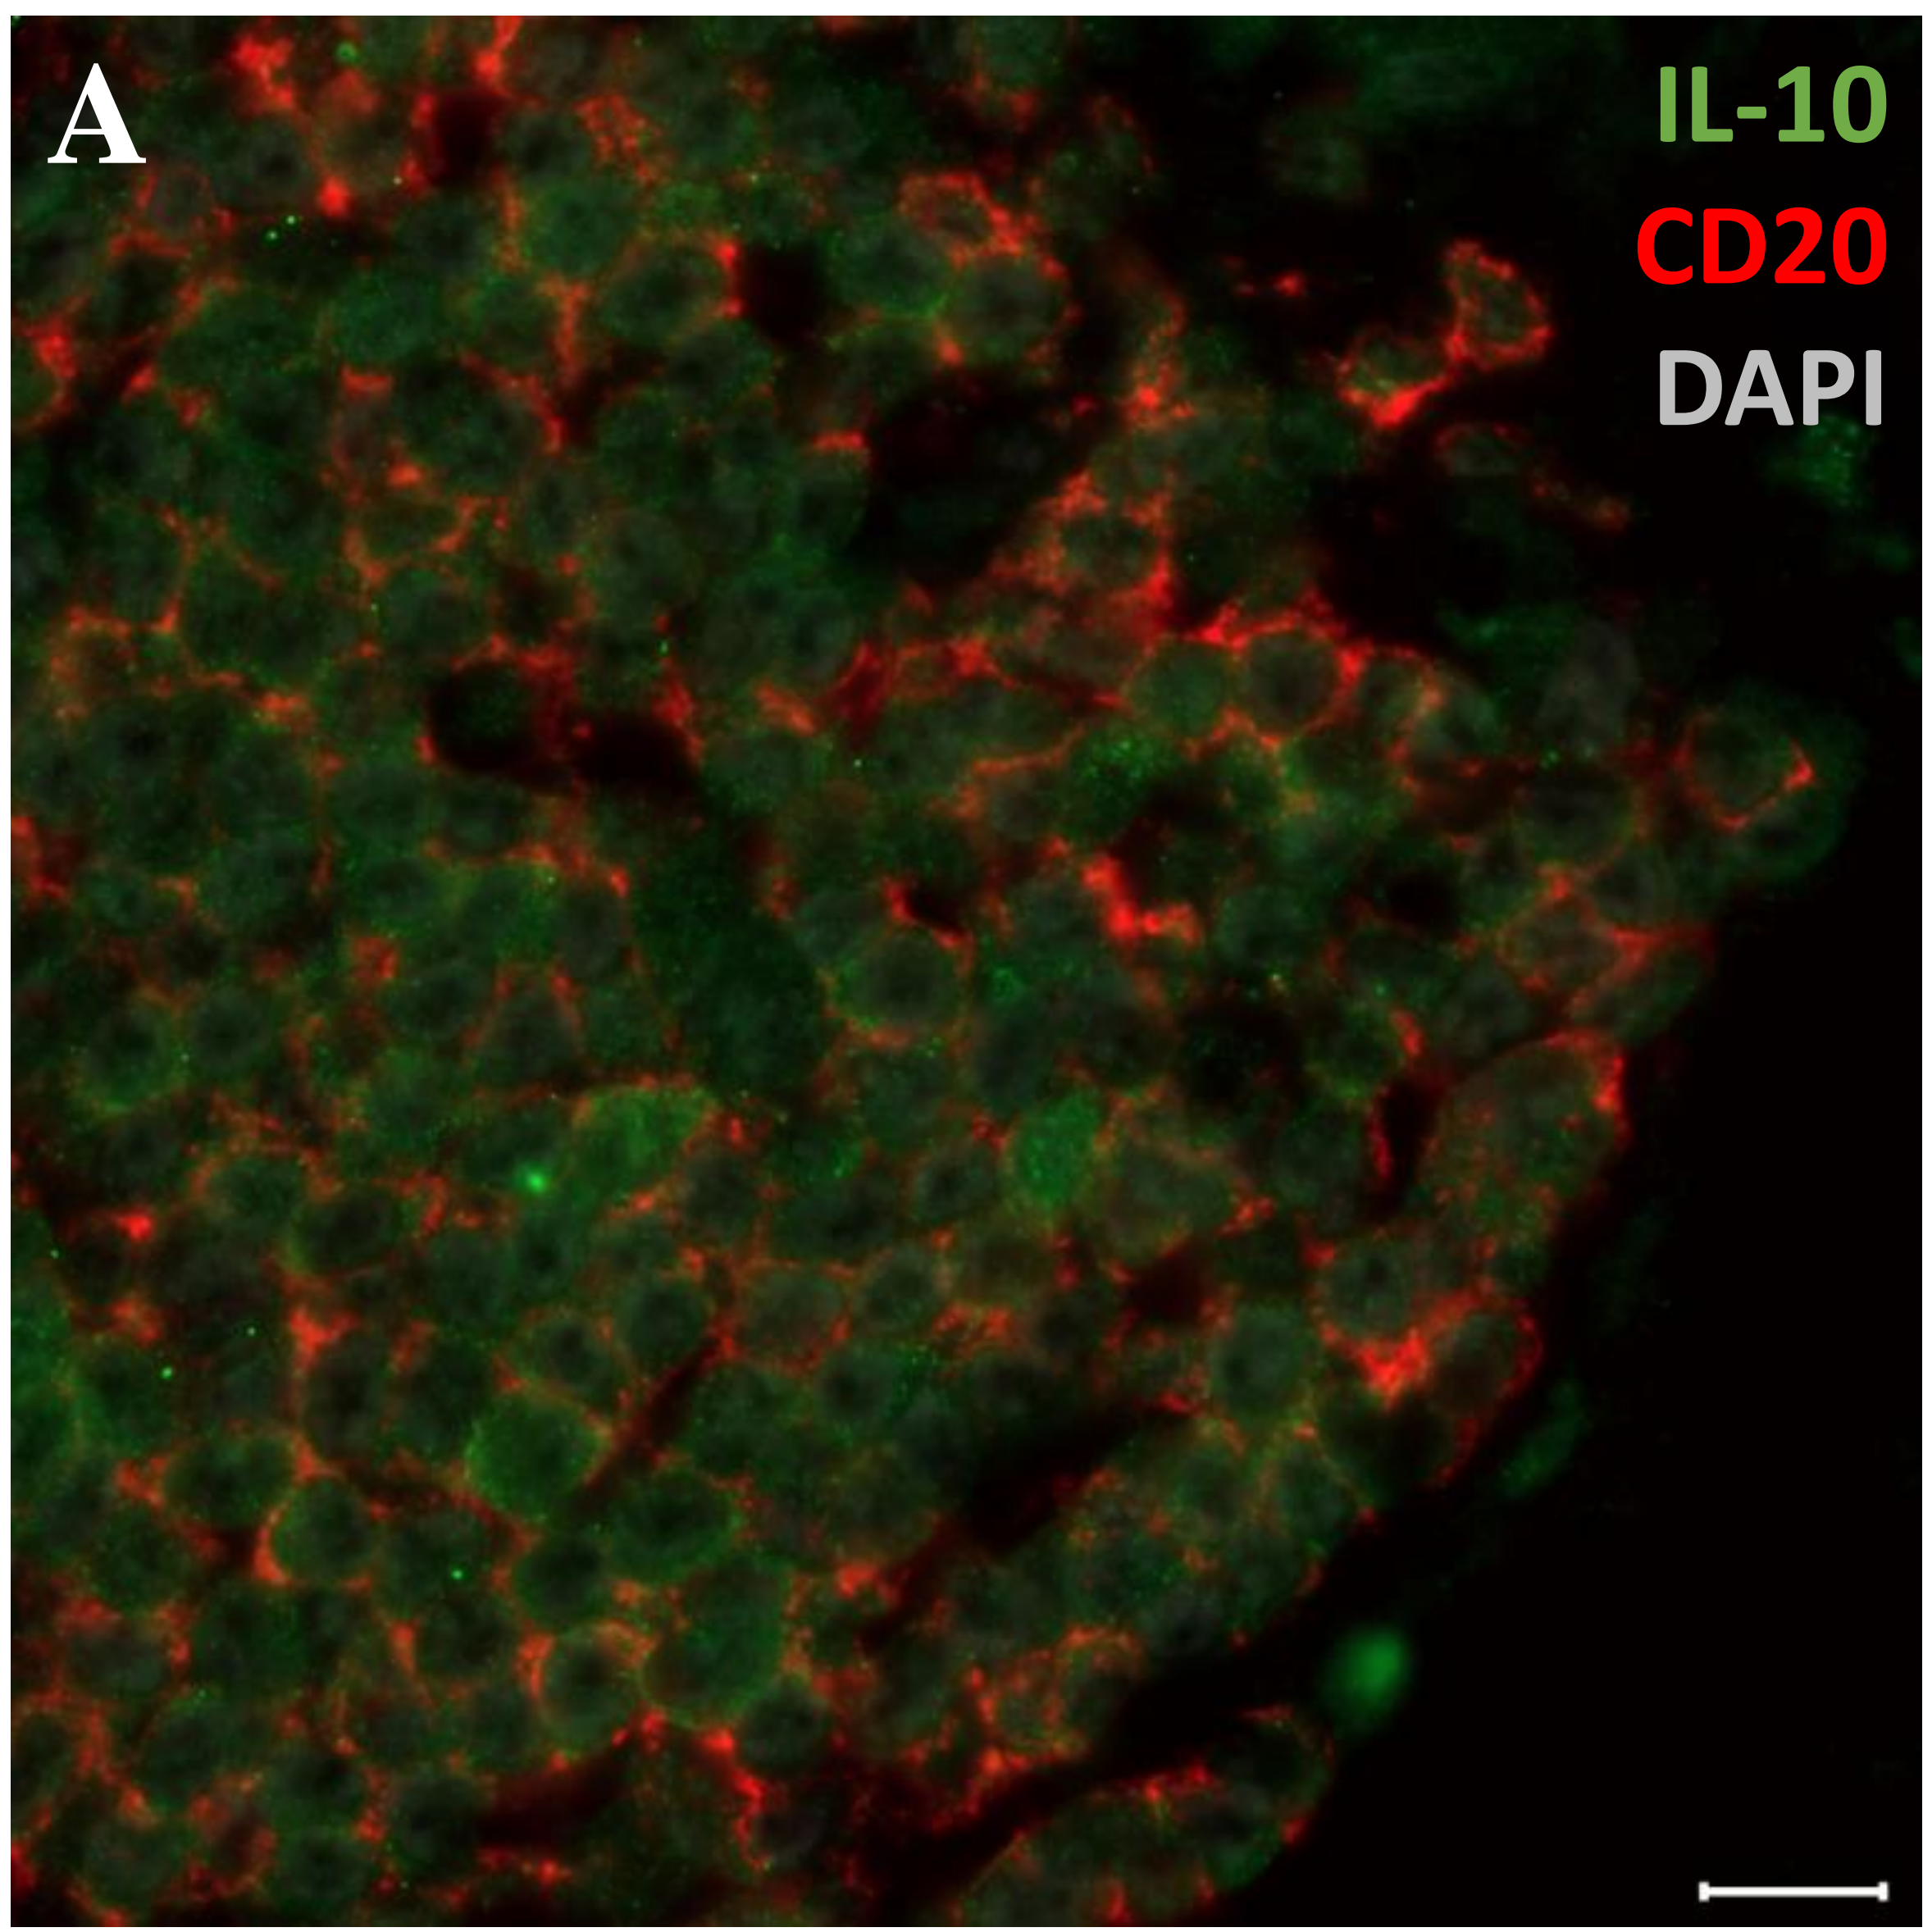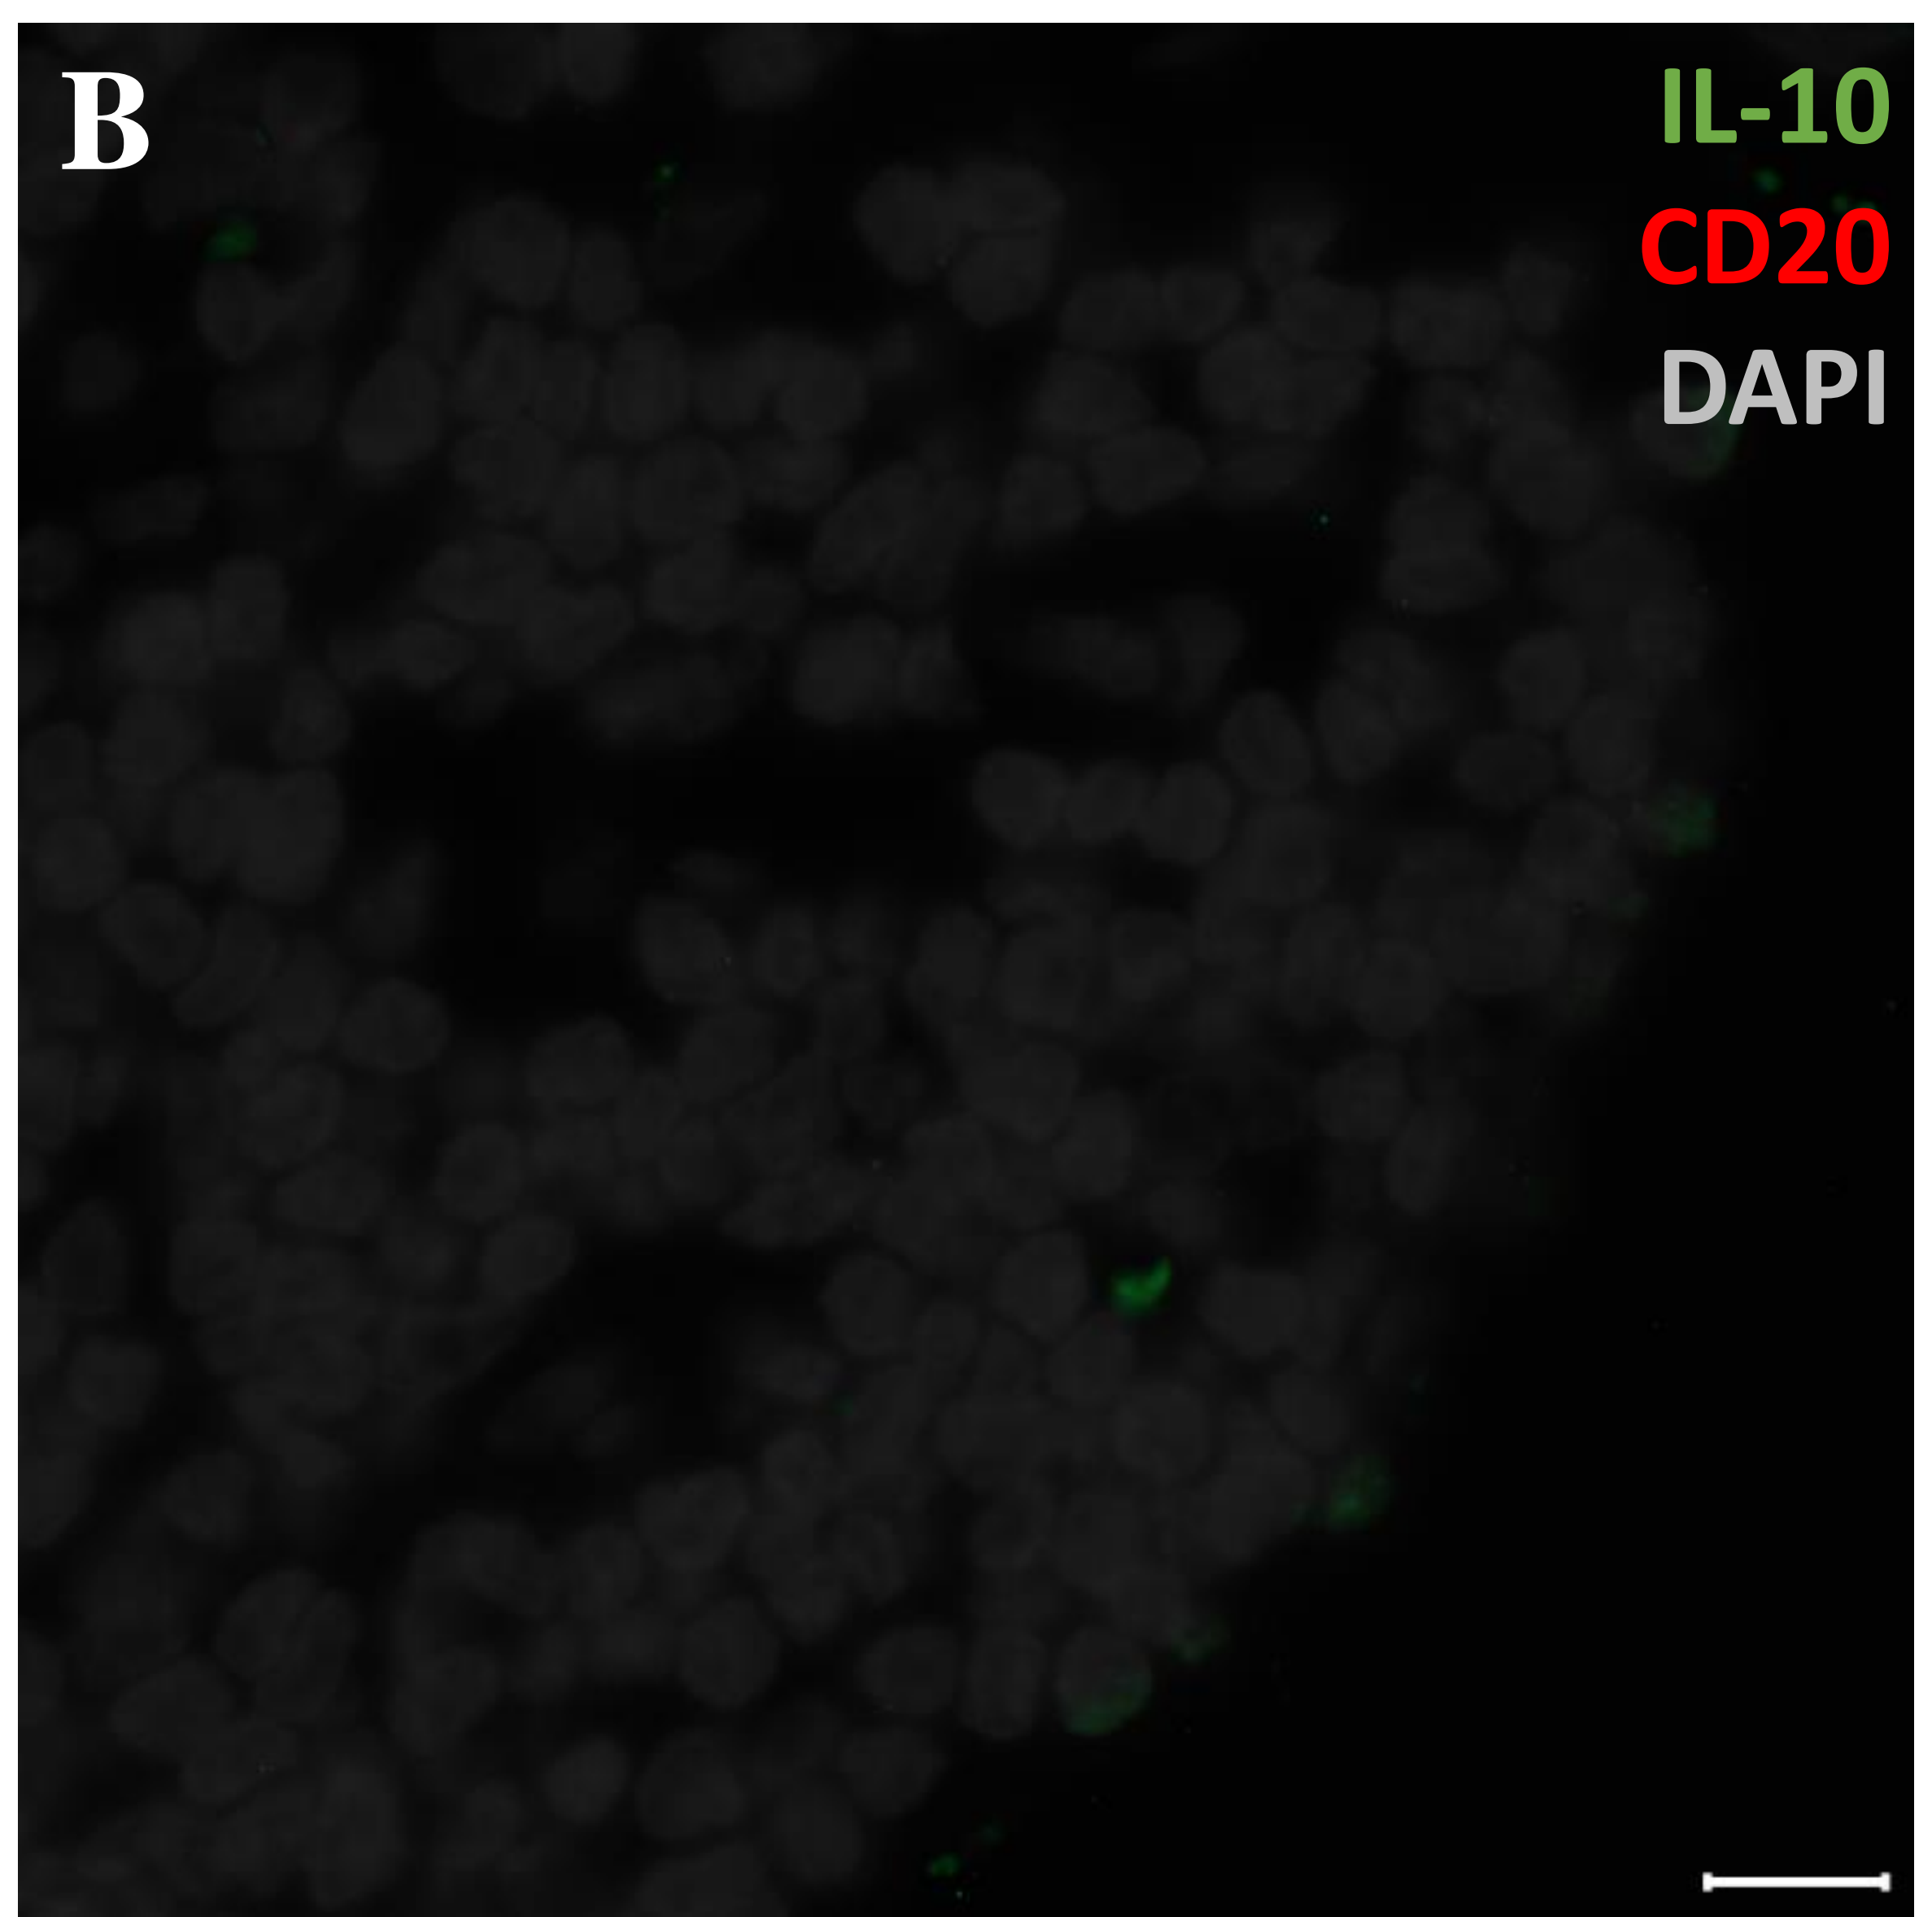

**Supplementary Figure 3.**
